# Supplementary material for: Localization of all four ZnT zinc transporters in Dictyostelium and impact of ZntA and ZntB knockout on bacteria killing
Source: Oxford University Press journal article supplement (doi:10.1242/jcs.222000), 2018-11-07
Supplement: jcs222000supp.pdf [file jcs222000supp.pdf]

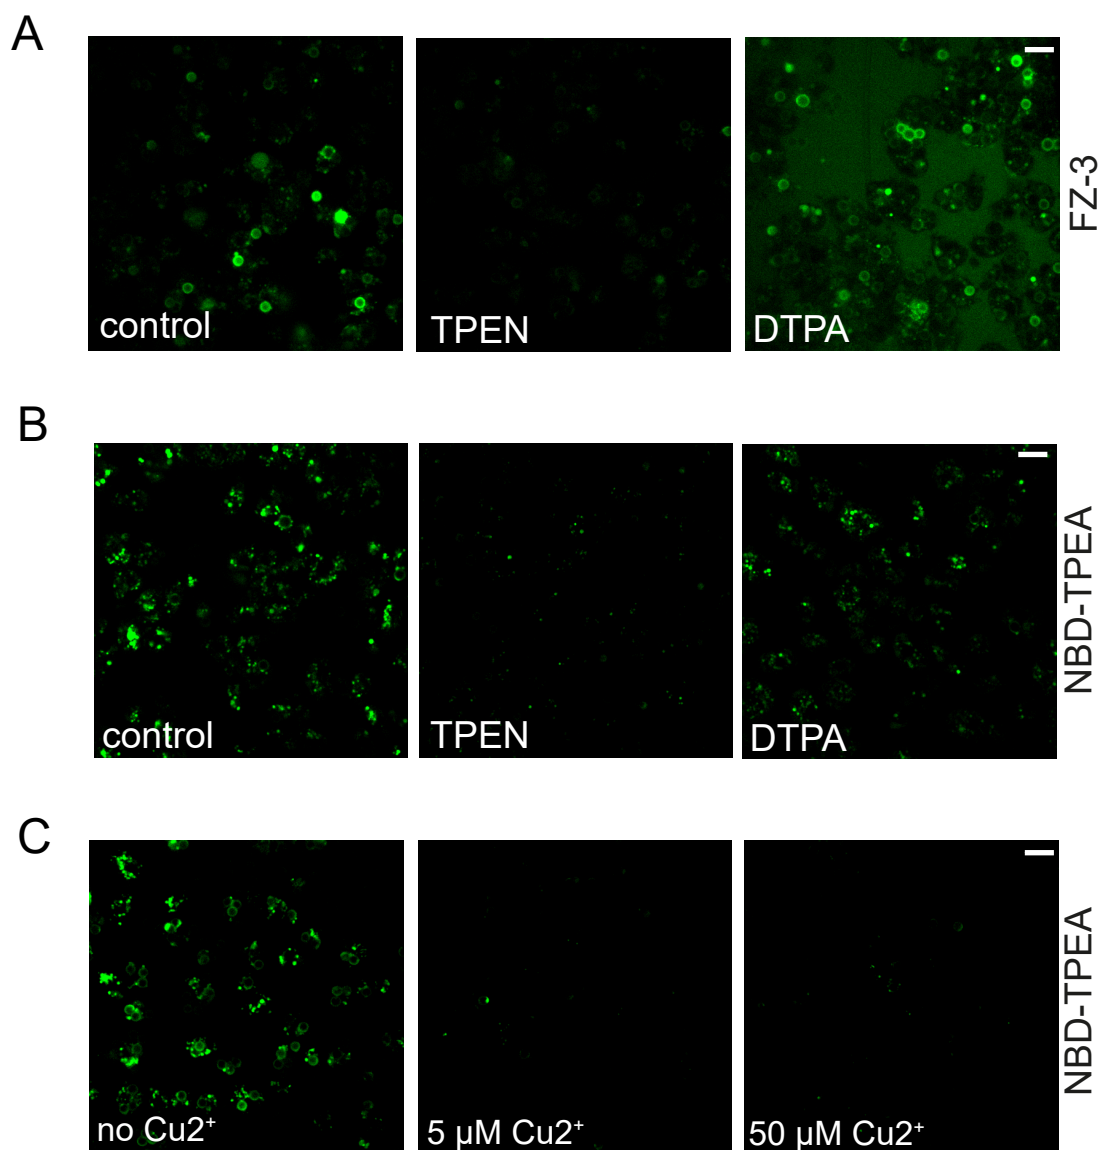

**Fig. S1.** Control experiments showing the specificity of FZ-3 and NBD-TPEA for Zn and the quenching of NBD-TPEA by Cu. A.-C. Cells were incubated with the different chelators or  $\text{CuSO}_4$  at the indicated concentrations for 3 hrs before the staining with FZ-3 and NBD-TPEA was performed. Afterwards cells were fed with 3  $\mu\text{m}$  and images were taken by live-microscopy. Importantly, the chelators and  $\text{CuSO}_4$  were present throughout the experiment.

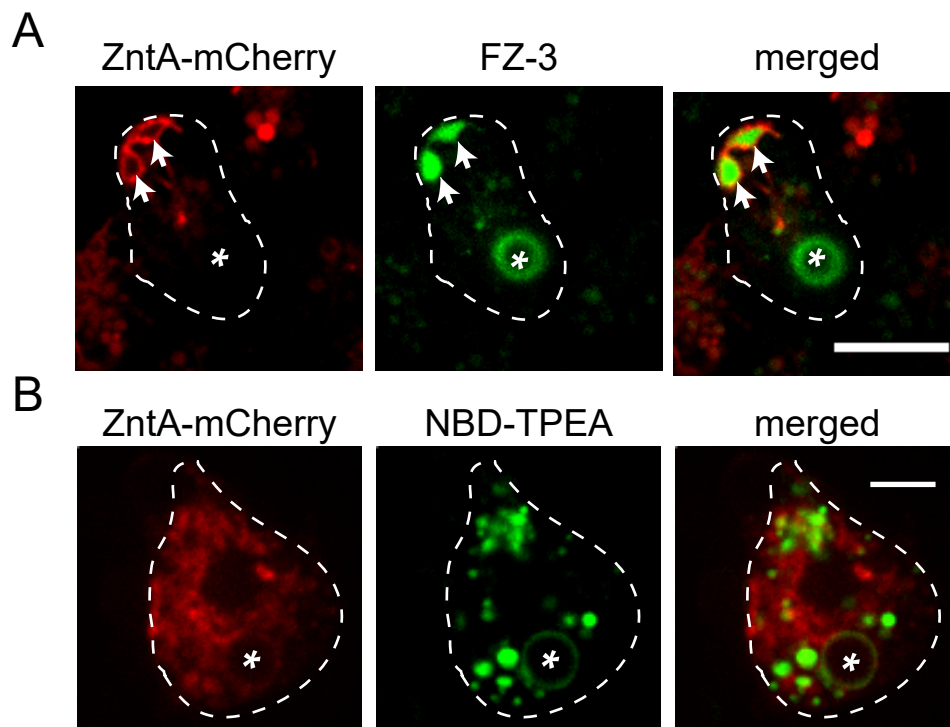

**Fig. S2. ZntA-mCherry is not present on BCPs. A. and B.** Cells expressing ZntA-mCherry were stained with FZ-3 and NBD-TPEA and fed with 3 μm latex beads. Images were taken live. Asterisks label BCPs, arrows point to FZ-3-positive CV-bladders. Scale bars 10 μm (A), 5 μm (B).

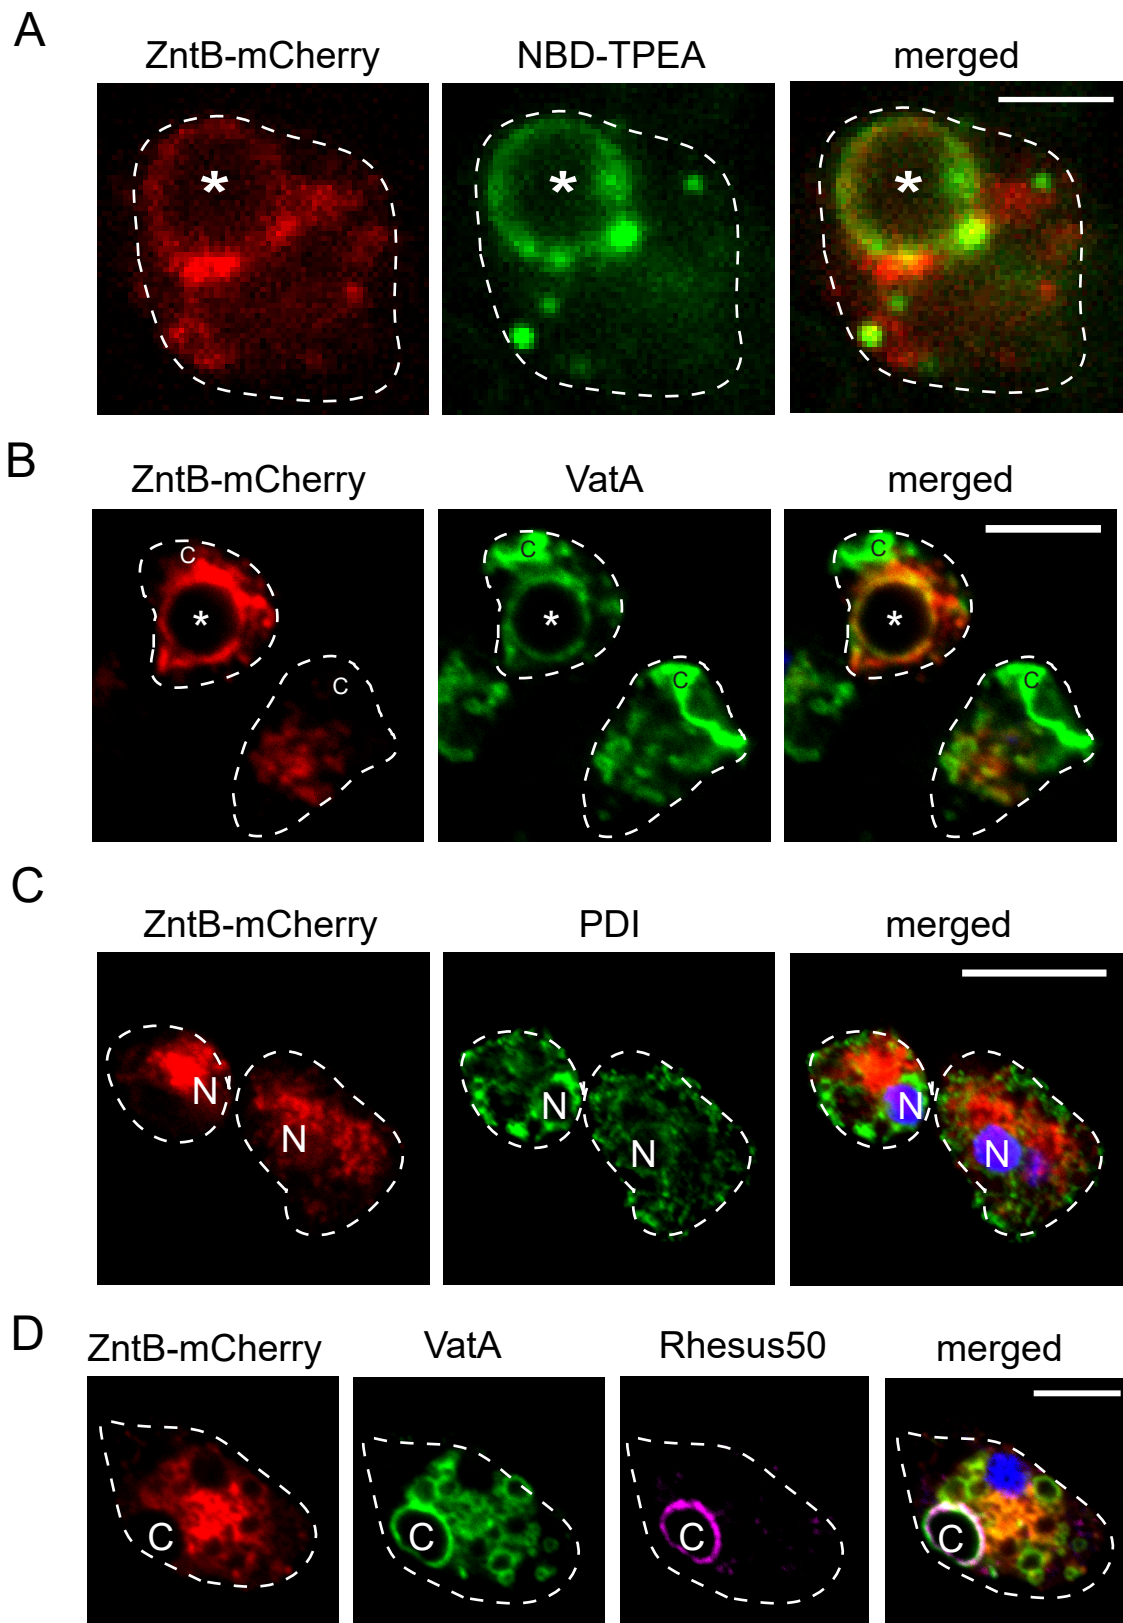

**Fig. S3. ZntB-mCherry decorates BCPs and does not co-localize with ER- and CV-markers. A.** ZntB is present at BCPs at the lysosomal maturation stage. Cells expressing ZntB-mCherry were stained with NBD-TPEA and fed with 3  $\mu\text{m}$  latex beads. Images were taken live. Scale bar, 5  $\mu\text{m}$ . **B.** ZntB-mCherry co-localizes with the vATPase at BCPs. Scale bar, 10  $\mu\text{m}$ . **C. and D.** ZntB-mCherry does not localize at the ER and the at the CV. ZntB-mCherry expressing cells were fixed and stained with antibodies against PDI (C) and Rhesus50 (D). Nuclei were stained with DAPI. Scale bars, 10  $\mu\text{m}$  (C) and 5  $\mu\text{m}$  (D). Asterisks label a BCPs, C: tubular network of the CV, N: nucleus.

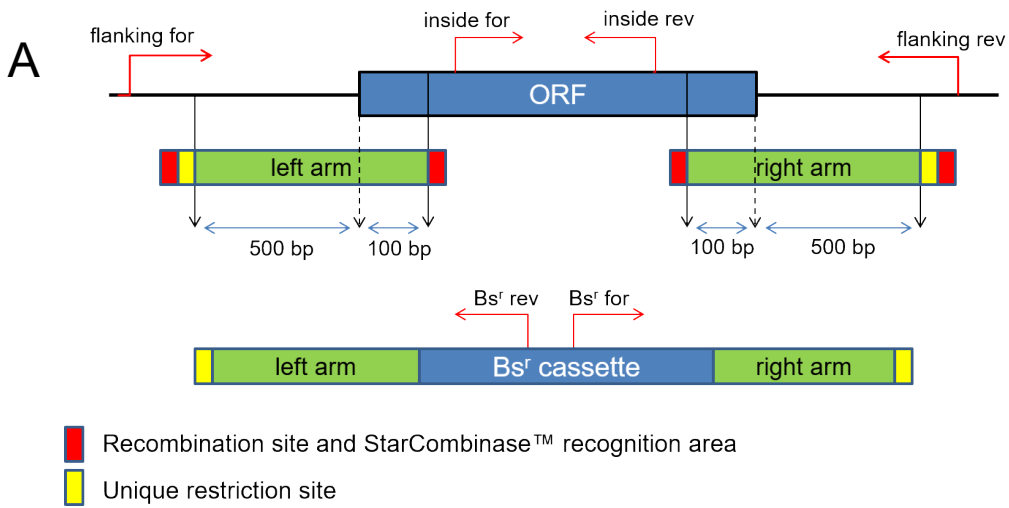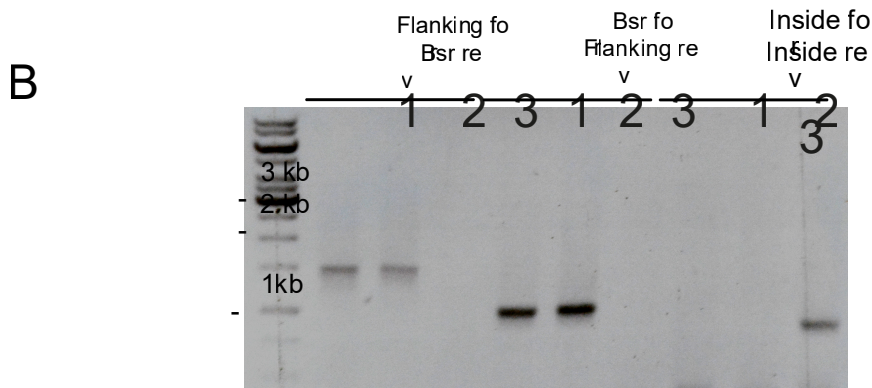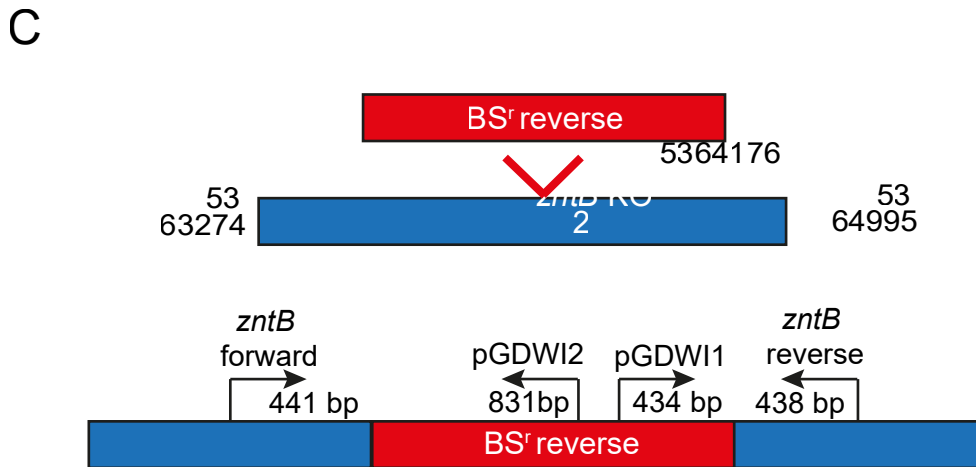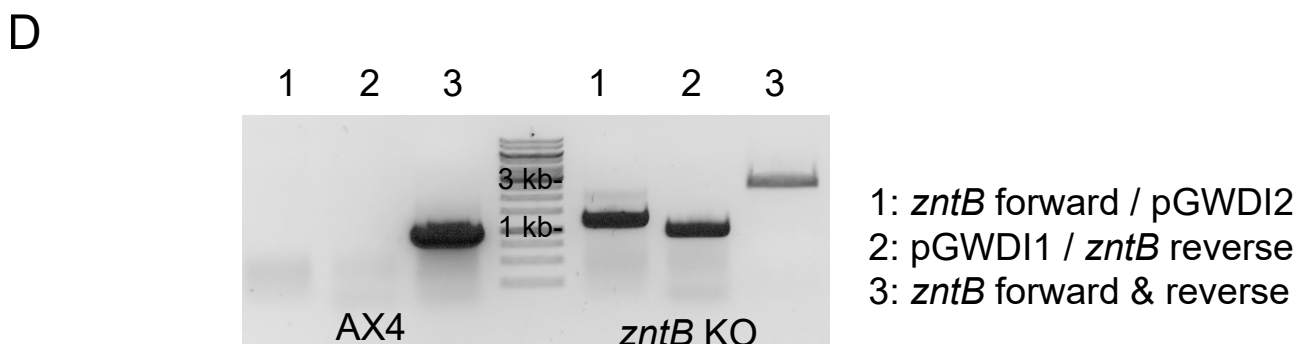

**Fig. S4. Generation of a *zntA* KO by homologous recombination and localization of the insertion in the *zntB* KO.** **A.** Schematic drawing of the *zntA*-encoding gene locus (ORF, blue) flanked by non-coding segments. For gene disruption, the resistance cassette (BSr, green) was integrated removing a segment in the middle of the gene (between the inside forward/inside reverse primers) using the StarCombinase and the StarGate cloning kit. The red arrows indicate primers that were used to monitor correct integration. **B.** PCR-analysis of two *zntA* mutants (#1 and #2) and wild type (#3). Using the flanking forward/BSR reverse or the flanking reverse/BSR forward primer combinations small products were obtained in both mutants, but not in the wild type. The inside forward/inside reverse primer combination yielded a small product in the wild type, but not in the mutants. Experiments were performed using mutant #1. **C.** The restriction-mediated insertion of the *zntB* KO interrupts the gene approximately in the middle at chromosomal position 5364176 (Chromosome 3). **D.** A diagnostic PCR was performed to confirm the insertion into *zntB* using the primers indicated in C.

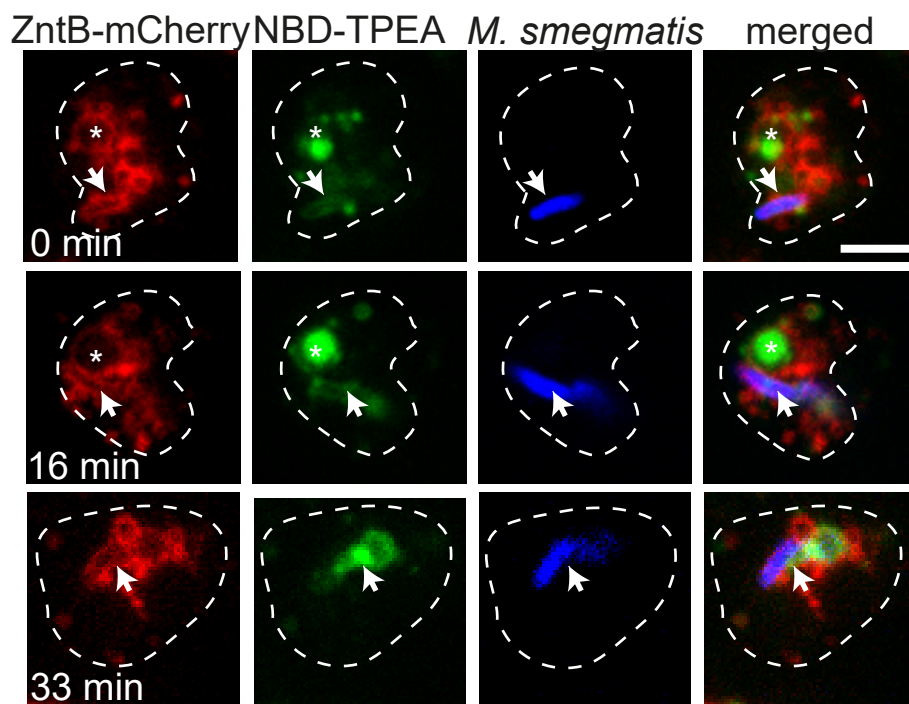

**Fig. S5. ZntB-mCherry is localized at the *M. smegmatis*-containing phagosome.** Cells expressing ZntB-mCherry were stained with NBD-TPEA and fed with *M. smegmatis*. Images were recorded live. Scale bar, 5  $\mu$ m. Arrows label phagosomes, asterisks point to zincosomes.

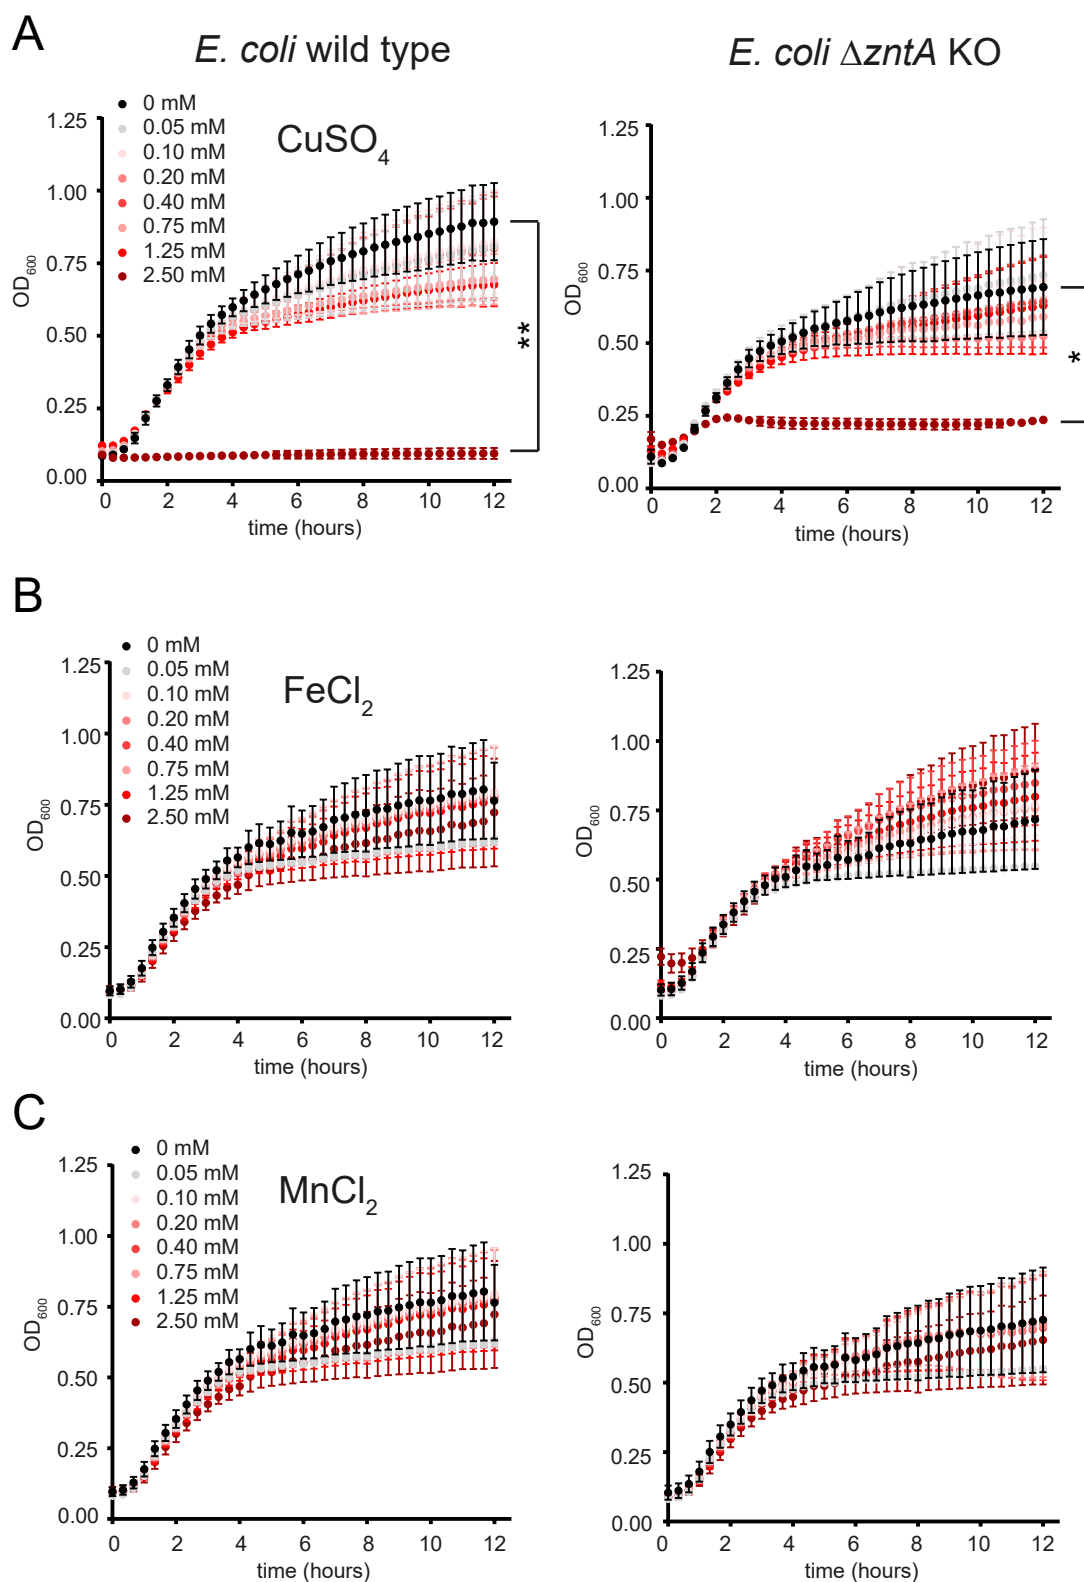

**Fig. S6. The *zntA* *E. coli* KO is not susceptible to increasing concentrations of  $\text{CuSO}_4$ ,  $\text{FeCl}_2$ ,  $\text{MnCl}_2$ .** *E. coli* strains were incubated in LB. Metals were added as indicated. The  $\text{OD}_{600}$  was measured with the help of a 96-well plate reader (SpectraMax i3, Molecular Devices). Statistical differences were calculated with a Bonferroni post hoc test after two-way ANOVA. Significantly different values were indicated by an asterisk (\*  $P < 0.5$ , \*\*  $P < 0.01$ ).



**Table S1. *Dictyostelium* material used for this study.**

| <i>Dictyostelium</i> strains           | Plasmids used for transformation                                | Reference                                                              |
|----------------------------------------|-----------------------------------------------------------------|------------------------------------------------------------------------|
| Ax2(Ka) ZntA-mCherry                   | ZntA-mCherry<br>(see below)                                     | This study                                                             |
| Ax2(Ka) ZntB-mCherry                   | ZntB-mCherry<br>(see below)                                     | This study                                                             |
| Ax2(Ka) ZntC-mCherry                   | ZntC-mCherry<br>(see below)                                     | This study                                                             |
| Ax2(Ka) ZntD-mCherry                   | ZntD-mCherry<br>(see below)                                     | This study                                                             |
| Ax2(Ka) <i>zntA</i> KO                 | See below                                                       | This study                                                             |
| Ax2(Ka) <i>zntA</i> KO<br>mCherry-ZntA | mCherry-ZntA<br>(see below)                                     | This study                                                             |
| AX4 <i>zntB</i> KO                     | -                                                               | REMI library Prof. Christopher<br>Thompson                             |
| AX4 <i>zntB</i> KO<br>ZntB-mCherry     | ZntB-mCherry<br>(see below)                                     | This study                                                             |
| Ax2(Ka) AmtA-mCherry                   |                                                                 | (Barisch et al., 2015)                                                 |
| Ax2(Ka) VatB-RFP                       |                                                                 | (Carnell et al., 2011)                                                 |
| Ax2(Ka) RFP-VacA                       |                                                                 | This study                                                             |
| AX2 <i>wshA</i> KO                     |                                                                 | (Carnell et al., 2011)                                                 |
| AX2 <i>pikfyve</i> KO                  |                                                                 | (Buckley et al., 2018)                                                 |
| Plasmids generated for<br>this work    | Insert                                                          | Plasmid & Reference                                                    |
| ZntA-mCherry                           | <i>zntA</i> gDNA(DDB_G0283629)                                  | pDM1044 (Veltman et al., 2009)                                         |
| ZntB-mCherry                           | <i>zntB</i> gDNA(DDB_G0282067)                                  | pDM1044 (Veltman et al., 2009)                                         |
| ZntC-mCherry                           | <i>zntC</i> cDNA(DDB_G0269332)                                  | pDM1044 (Veltman et al., 2009)                                         |
| ZntD-mCherry                           | <i>zntD</i> cDNA(DDB_G0291141)                                  | pDM1044 (Veltman et al., 2009)                                         |
| mCherry-ZntA                           | <i>zntA</i> amplified from ZntA-mCherry                         | pDM1042 (Veltman et al., 2009)                                         |
| ZntA KO plasmid                        | pKOSG-IBA-ZntA<br>(please see Materials and Methods)            | StarGate® Acceptor Vector<br>pKOS-IBA-Dicty1<br>(Wiegand et al., 2011) |
| RFP-VacA                               | <i>vacA</i> was amplified from pDM323<br>GFP-VacA (lab plasmid) | pDM 324 (Veltman et al., 2009)                                         |

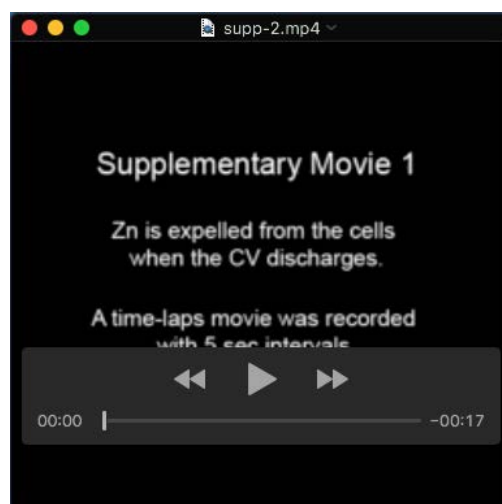

**Movie 1.** Zn is expelled from the cells when the CV discharges. For more information, see Fig. 1C.

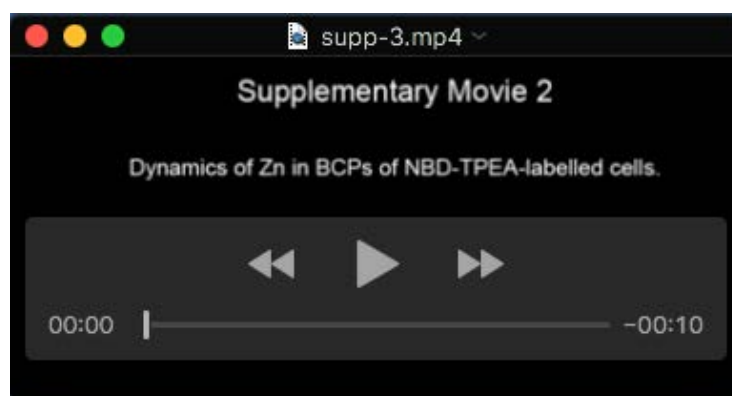

**Movie 2.** Dynamics of Zn in BCPs of NBD-TPEA-labelled cells. For more information, see Fig. 2A.

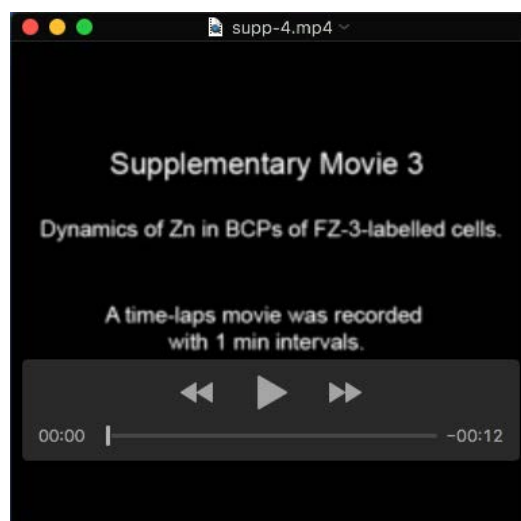

**Movie 3.** Dynamics of Zn in BCPs of FZ-3-labelled cells. For more information, see Fig. 2C.

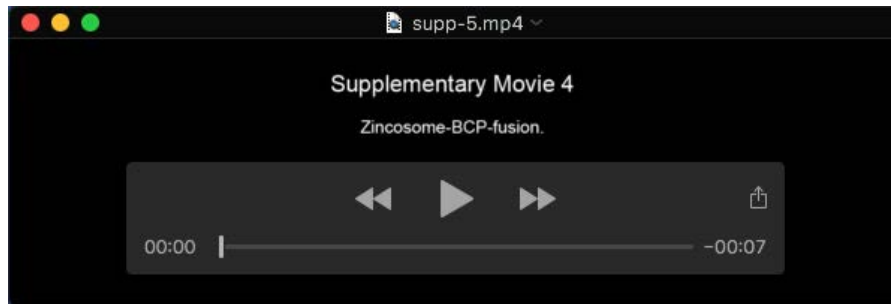

**Movie 4. Zincosome-BCP-fusion.** For more information, see Fig. 3A.

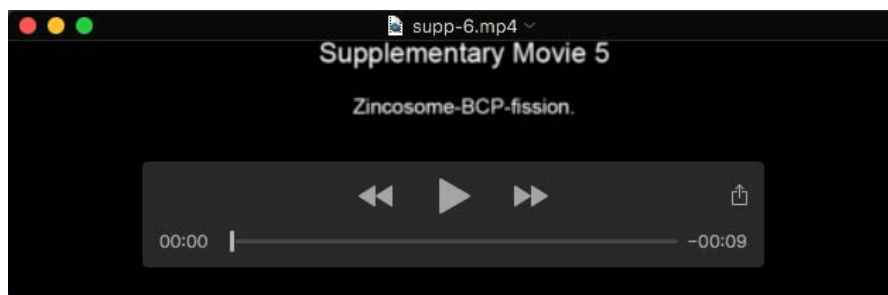

**Movie 5. Zincosome-BCP-fission.** For more information, see Fig. 3C.

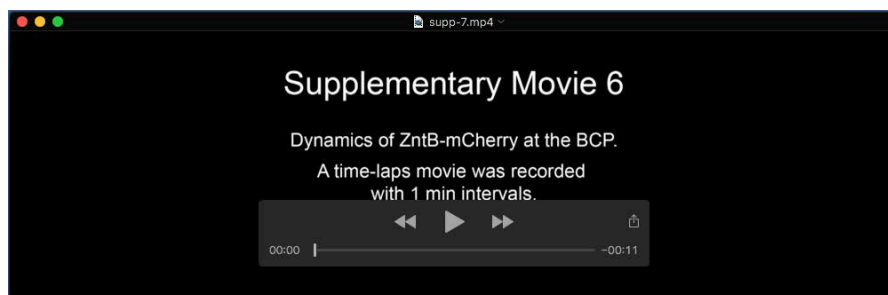

**Movie 6. Dynamics of ZntB-mCherry at the BCP.** For more information, see Fig. 4D.
